1 Exploring Potential Barriers and Facilitators to Integrate  
2 Tuberculosis, Diabetes Mellitus, and Tobacco-Control Programs  
3 in India

4  
5 Nisha Mutalikdesai<sup>1</sup>, Kajal Tonde<sup>2</sup>, Kanchan Shinde<sup>1</sup>, Rakesh Kumar<sup>3</sup>, Surbhi Gupta<sup>3</sup>, Girish  
6 Dayma<sup>1,2</sup>, Anand Krishnan<sup>3</sup>, Sanjay Juvekar<sup>2,1</sup>, Ailiana Santosa<sup>4</sup>, Nawi Ng<sup>4</sup>, Rutuja Patil<sup>1,2</sup>

7  
8 <sup>1</sup> KEM Hospital Research Centre, Community Health Research Unit, Pune, India.

9 <sup>2</sup> KEM Hospital Research Centre, Vadu Rural Health Program, Pune, India.

10 <sup>3</sup> All India Institute of Medical Sciences, Centre for Community Medicine, New Delhi, India.

11 <sup>4</sup> University of Gothenburg, School of Public Health and Community Medicine, Institution of  
12 Medicine, Sahlgrenska Academy, Gothenburg, Sweden

13

14

15 \*Corresponding Author:

16 Email- [n.mutalikdesai@kemhrevadu.org](mailto:n.mutalikdesai@kemhrevadu.org) (NM)

## 17 **Abstract:**

18 **Background-** Integrating Tuberculosis (TB), Diabetes Mellitus (DM), and Tobacco-Control (TC)  
19 programs in India presents a promising strategy to address the triple burden of these diseases.  
20 However, limited information exists regarding the feasibility and influencing factors of such  
21 integration. This study investigates potential barriers and facilitators to integrate TB, DM, and TC  
22 programs in Ambegaon Block of Pune District in Maharashtra and Ballabgarh Block of Faridabad  
23 District in Haryana states of India.

24 **Methods-** Qualitative in-depth interviews were conducted between Nov 2022 to March 2023  
25 among health workers, program managers, and stakeholders involved in program implementation  
26 (n=32). Interview guide was based on World Health Organization's Health System Strengthening  
27 framework. Purposive sampling and snowball sampling were used to select participants. Rapid  
28 analysis of the data was done using the WHO HSS Framework.

29 **Results-** There were barriers and facilitators for the integration of TB-DM-TC programs observed  
30 in India. The primary challenges for integration are at the level of service delivery which is largely  
31 attributed to inadequate implementation of all three programs and negligible involvement of  
32 private practitioners in the program implementation. Moreover, inadequate referral system,  
33 insufficient infrastructure, limited resources, a shortage of trained staff, and lack of essential drugs  
34 and equipment impeded the uptake and coverage of services.

35 **Conclusion-** The results highlight the critical importance of addressing barriers and facilitators of  
36 implementation program in India to build a robust structure of managing the triple burden of TB,  
37 DM and tobacco control. The proposed strategies, such as sensitizing health system staff,  
38 implementing feedback and referral systems, and developing cross-program digital platforms offer  
39 a roadmap for policymakers and healthcare system managers. A multidimensional approach is  
40 vital for overcoming barriers and facilitating integration.

41 **KEYWORDS:** *India, Diabetes mellitus, Tuberculosis, Integration, Health-care system, Barriers,*  
42 *Facilitators.*

## 43 **Introduction:**

44 As per the World Health Organization (WHO), India accounted for more than two-thirds of the  
45 global TB cases in the year 2020. India has the highest burden of TB worldwide and the second-  
46 highest burden of Diabetes Mellitus (DM) (1). According to global burden of diseases (GBD) data

47 for 2019, TB is still one of the top ten causes of disability-adjusted life years (DALYs), despite a  
48 recent rapid epidemiological change (2).

49 The triple burden of TB, DM, and tobacco addiction poses a threat to many TB-endemic countries  
50 that have not attempted to address it concurrently (3), demanding a shift from the traditional  
51 tuberculosis-centric lens to a more holistic perspective. Considering the increased global risk of  
52 infectious diseases and Non-Communicable Diseases (NCD) comorbidity, a collaborative  
53 preventative approach can be used to relieve the strain on the overcrowded health system. As a  
54 result, an integrated TB-DM-tobacco control approach may be considered effective in detecting  
55 and treating TB cases, as well as mitigating the residual burden of intersecting factors that  
56 contribute to a high annual incidence of TB morbidity and mortality.

57 This integration may promote a holistic approach to health measures, where the combined efforts  
58 address not only infectious diseases like TB but also chronic problems such as DM and the  
59 universal problem of tobacco use. This synergy will boost the total influence on public health.  
60 Given the prevalence of intersecting TB-DM epidemics, many countries embraced the WHO  
61 collaborative framework (4) for developing preventative TB-DM co-management programs. India  
62 also initiated TB-DM co-management operations through the National Tuberculosis Elimination  
63 Program (NTEP) but failed to create sufficient evidence discussing health system readiness and  
64 obstacles associated with the framework's adoption (5).

65 The NTEP, formerly known as the Revised National TB Control Programme (RNTCP), is one of  
66 the biggest health programmes in the world. Since March 2016, India has implemented the  
67 National Programme for Prevention and Control of Cancer, Diabetes, CVD, and Stroke  
68 (NPCDCS), which was launched in 2010, now called as National Programme for Prevention &  
69 Control of Non-Communicable Diseases (NP-NCD). In line with the global framework created by  
70 WHO and the International Union Against TB and Lung Diseases in 2011, NTEP and NPCDCS  
71 created a joint framework in 2017. The National Tobacco Control Program (NTCP) was  
72 established by the Indian government in 2007-2008 as part of the 11th Five-Year Plan (FYP).

73 Eliminating tuberculosis by 2025 remains an ambitious yet imperative goal, considering the  
74 intricate challenges posed by socio-cultural practices and healthcare systems (5). Our study,  
75 focusing on the integration of TB and DM programs, sheds light on critical challenges that hinder  
76 timely detection and effective management. The lack of awareness among healthcare practitioners  
77 and the general public regarding the intricate relationship between TB and DM leads to missed  
78 opportunities for early identification (6). Shared symptoms, such as fatigue, weight loss and  
79 increased susceptibility to infections further compound diagnostic complexities, delaying essential

80 care. Our research, building upon the findings of previous studies (1,7,8), brings forth these  
81 challenges within the specific context of TB and DM integration, offering novel insights into the  
82 unique hurdles faced in achieving a comprehensive approach to healthcare.  
83 Moreover, there exists a paucity of empirical evidence concerning nations characterized by  
84 elevated tobacco consumption and the incorporation of smoking control initiatives into the TB  
85 integration framework. This research endeavors to delve into the facilitators and barriers associated  
86 with the seamless integration of TB-DM-TC activities within the healthcare landscape of India.

## 87 **Methods:**

### 88 **Ethics Statement**

89 The study received ethical approval from KEM Hospital Research Centre's Research Ethics  
90 Committee (Reference No. KEMHRC/RVM/EC/2105) and the Institute Ethics Committee of All  
91 India Institute of Medical Sciences, New Delhi (Ref No. IEC-866/04.11.2022). All participants  
92 were contacted via email or phone and informed about purpose of the study and objectives.  
93 Those who showed willingness to participate in the study were administered a written informed  
94 consent form. We included all participants who consented to be part of the study. The data were  
95 collected from November 2022 to January 2023.

### 96 97 **Study Design**

98 This qualitative study aimed to comprehensively investigate potential barriers and facilitators to  
99 integrating TB, DM, and TC programs in India from various perspectives by involving a diverse  
100 range of stakeholders. The study was conducted in two Indian districts: one each in the state of  
101 Maharashtra and another in Haryana.

102  
103 Respondents were selected using purposive and snowball sampling strategies to ensure a diverse  
104 range of experiences and perspectives. A total of 32 in-depth interviews (IDI) were conducted  
105 using an in-depth interview guide to gather insights and perspectives on the feasibility of  
106 integrating the three programs. Of these, 13 participants were women and 19 were men. The study  
107 engaged participants across various stakeholder levels, including (i) national-level stakeholders  
108 (n=1, from NTEP), (ii) state-level stakeholders (N=11, 7 from NTEP, 2 from NPCDCS, and 2  
109 from NTCP), (iii) district-level stakeholders consisting of ASHA workers, medical officers,  
110 community health officers, lab technicians, etc. (n=17, with direct involvement in the fieldwork  
111 for all the programs), (iv) researchers (n=1, from NPCDCS), and (v) non-governmental  
112 organization (NGO) representatives (n=2, from NTEP)

113  
114 The data collection and analysis were guided by the World Health Organization's (WHO) Health  
115 System Strengthening (HSS) framework (9), which outlines six building blocks for health system  
116 analysis and improvement. The in-depth interview guide comprised six sections *viz.* Service  
117 Delivery, Health Workforce, Health Information System, Financing, Governance and Leadership,

118 and Access to Essential Medicine that investigated current service provision strategies for TB and  
119 DM care. These sections used to explore the barriers and facilitators influencing the delivery of  
120 TB/DM/TC services, and to assess the feasibility of implementing an integrated program for TB,  
121 DM and tobacco control.

122  
123 The interview guide comprised open-ended questions to explore current service provision  
124 strategies for TB and DM care, identified barriers and facilitators affecting the delivery of  
125 TB/DM/TC services, and assessed the feasibility of rendering integrated programs for these  
126 diseases (Annexure 1). The IDIs were audio-recorded, also after participants consented, notes were  
127 taken by a trained note taker. The interviews were conducted face-to-face, and on average, lasted  
128 45 minutes per interview.

## 129 **Data analysis**

130 We used Rapid analysis approach (10) to code the data. The Rapid analysis matrix was created in  
131 excel sheets, using a deductive approach and the sub-codes and codes were derived first from the  
132 data collection tools. Some codes were later inductively added from the data during the coding  
133 process. All the coded data were arranged in themes based on the WHO HSS framework. The  
134 study team members who collected the data listened to the audio-recorded files and coded the  
135 excerpts from the interview in the Rapid analysis matrix. This matrix was later translated from  
136 Marathi/ Hindi (local languages) into English. After coding, the data were rearranged using WHO  
137 HSS framework where data in each sub-code and later codes was summarized. Data from each  
138 code was designated to a WHO HSS framework building block for analysis.

## 139 **Results:**

140 The qualitative data analysis revealed several barriers and facilitators to the integration of TB, DM,  
141 and TC programs in India. These findings provide valuable insights for the program coordinators  
142 and implementers in the country. We have presented our results based on the WHO HSS  
143 framework's (2007) building blocks. Each theme is arranged under each of the six building blocks  
144 of the framework.

### 145 **1. Service Delivery**

146 Service Delivery entails how healthcare services are delivered and managed. The Indian health  
147 system's current service delivery structure and regulations pose both facilitators and barriers.

#### 148 **1.1 Inadequate implementation of protocols**

149 The data confirm the existence of TB-DM and TB-TC frameworks; however, the lack of detailed  
150 operational guidelines lead to inadequate collaborative efforts across these programs. While DM  
151 screenings are conducted for all TB patients, not all DM patients exhibiting the four-symptom  
152 complex (cough of any duration, fever, night sweat, weight loss) undergo screening for TB. This  
153 deficiency in service delivery contributes to a neglect of symptoms and a reduce motivation to visit  
154 health facilities. Inadequate monitoring, inactive management surveillance, and infrequent public  
155 awareness campaigns further hinder to the effectiveness of bi-directional TB-DM screening and  
156 smoking control initiatives.

157 *“If we see the TB report, 90% of the TB patients are screened for diabetes. There are systems and*  
158 *mechanisms for that. Ni-kshay is there, screening and monitoring is happening meticulously. But*  
159 *if we look at it the other way, there is a gap in the implementation for screening of TB in NCD*  
160 *clinics. Even though the framework is present, there are no operational guidelines as such.” (IDI#*  
161 *22)*

#### 162 **1.2 Lack of Linkage Mechanisms**

163 Barriers for integration of TB-DM-TC program faces barriers due to an inadequate referral system,  
164 hindering proper management and continuity of care for patients with co-infections. The absence  
165 of communication between primary care facilities and referral hospitals undermines progress and  
166 potential enhancements.

167 “...Referral and Feedback mechanisms are not strong at all. Testing is happening in NCDs, but  
168 we don't get any feedback from the TB patients that are sent here in these NCD clinics.” (IDI# 17)  
169 Participants highlighted the absence of links in the referral system, indicating potential disruptions  
170 in patient follow-up processes. Issues in rural healthcare delivery encompass non-compliance with  
171 the system, self-referrals to doctors, and direct referrals to specialists.

### 172 **1.3 Limited availability of Tobacco Control Centers**

173 The study identified that the integration of TC services into the TB-DM program is hindered by  
174 the limited availability of tobacco control centers. Inadequate infrastructure, resources, trained  
175 staff, and essential drugs and equipment impeded the uptake and coverage of services.  
176 Consequently, there is low awareness and insufficient support for individuals struggling with  
177 tobacco addiction.

178 “For tobacco control and counseling, there is no provision for below taluka [block] level,  
179 everything happens till block level. Dedicated centers are there along with dentists and counselors,  
180 but not all are in a working condition.” (IDI# 9)

181 The insufficient presence of trained healthcare professionals further restricted the implementation  
182 of the NTCP initiative and contributed to accessibility challenges. Limited awareness regarding  
183 the detrimental effects of tobacco has led to a scarcity of Tobacco Control Centers, resulting to a  
184 low demand for services and reluctance among individuals to seek access.

### 185 **1.4 Relatively robust program guidelines for TB when compared to DM**

186 All participants unanimously agreed that decentralizing the effective TB control program down to  
187 the primary healthcare and private health facility level, serves as an appropriate starting point for  
188 the integration of TB-DM-TC programs. The findings indicated that the existing TB program  
189 guidelines were firmly established and widely implemented within the Indian health system. These  
190 guidelines laid a robust foundation and framework for integrating DM and smoking control  
191 services.

192 “NTEP is a well-structured program with good human resources. TB services are provided free  
193 of cost. There is a Ni-kshay portal for reporting the patients. The program has strong guidelines  
194 and protocols in place. The NCD program is a little weak. Very poor mechanism of referring to  
195 the patients.” (IDI# 2)



196 The Indian health system lacks well-developed guidelines for DM, with patients managed within  
197 general services without a specialized section. This probably leads to abrupt medical attention and  
198 assistance to DM patients, creating difficulties in accessing necessary care, even in emergencies.

## 199 **2. Health Workforce**

200 The health workforce theme addresses the availability, responsibilities, training and remuneration  
201 for healthcare personnel in integrated care, as well as barriers and facilitators in delivering  
202 integrated care.

### 203 **2.1 Well defined responsibilities for implementation of TB program**

204 While the NTEP in India has designated workforce responsible for different levels of  
205 implementation, the DM program, conversely, receives minimal attention with no designated staff.  
206 The roles and responsibilities within the DM program are unclear. The implementing staff at the  
207 public healthcare facilities lack clarity, leading to ambiguity and confusions that hinder effective  
208 implementation and the integration of TB and DM screening.

209 *“Because of the lack of attention paid to diabetes care, there is no reference guideline. As a result,*  
210 *we have been diagnosing and managing diabetes patients in a haphazard way. Also, the NPCDCS*  
211 *program has many diseases clubbed together because of which there is no separate staff present*  
212 *only for DM.” (IDI# 12)*

### 213 **2.2 Overburdened Human Resources**

214 Healthcare workers in the study areas face overwhelming workloads in implementing routine  
215 programs, reporting, procurement, and overseeing critical segments. The current health workforce  
216 is insufficient to meet service demands and embrace new initiatives. Introducing integrated TB  
217 and DM screening programs might amplify workloads, potentially leading to burnout, fatigue, and  
218 stress; such conditions could have a detrimental effect on productivity and efficiency.

219 *“There is a lot of workloads on us. We do not even get proper incentives for the amount of work*  
220 *we are doing. We have to keep a check on all the people in our area for all diseases. Apart from*  
221 *our work, sometimes we have to manage PHC work also because there are less people working*  
222 *here.” (IDI# 14)*

## 223 **2.3 Lack of regular training to the Healthcare Personnel**

224 Ensuring regular training for healthcare personnel is crucial for managing TB and DM cases.  
225 However, resources limitation and competing priorities often hinder training opportunities,  
226 resulting in delayed diagnosis, improper treatment, and poor patient outcomes. The lack of  
227 adequate training further contributes to increased turnover rates, intensifying the burden on the  
228 healthcare system.

## 229 **3. Medical Products & Technology**

230 The study identified limited issues in the availability and accessibility of essential medicines and  
231 diagnostic materials, thereby benefiting the integration of TB, DM, and TC programs.

### 232 **3.1 Supply of medicines & diagnostic kits**

233 A crucial facilitator for the successful implementation of the TB program relies on a smooth supply  
234 of medicines and diagnostic kits. The NTEP ensures timely and effective treatment by  
235 implementing a drug procurement and distribution system, collaborating with other agencies to  
236 ensure quality. *“Yes, sufficient kits are there. For TB, we have a portal which is implemented  
237 throughout the country, that is the dispensation module. At what place what drugs are available  
238 or are over is known through that portal. Hence immediate actions can be taken.” (IDI# 2)*

239  
240 Participants acknowledge the current logistic supply chain system as an appealing possibility for  
241 long-term medical supply chain administration for both diseases. Contrarily, the frequent stockouts  
242 of diabetes management supplies and medicines in India hinder the implementation of diabetes  
243 management programs. This leads to interruptions in care, suboptimal control, increased  
244 complications, and reduced quality of life. Moreover, these stockouts affect patients' and providers'  
245 confidence, resulting in a loss of trust in the healthcare system.

246 *“For 3 months there has been a shortage of medicines. This happens very frequently when it comes  
247 to DM medicines and other supplies. Few months ago, I had no supply of Metformin for 2 months.  
248 There is also insufficiency in the glucometer strips due to which the testing is hampered.” (IDI#  
249 15)*

250  
251 Some respondents express the belief that DM control medicines are prohibitively expensive,  
252 resulting in expensive prescriptions from private retail pharmacies. For many economically

253 disadvantaged patients, the inability to afford out of pocket for medicines during stockouts in  
254 public health systems leads to lower doses and poor medication adherence. Diagnosing diabetes  
255 requires more than merely conducting blood sugar tests; it necessitates medical supplies to ensure  
256 effective management in India.

257 *“The present integrated medicine supply system, which is managed by the Pharmaceutical Fund  
258 and Supply Agency (PFSA), does not adequately accommodate DM supply. We frequently run out  
259 of stock. Even at private wholesale providers, the needed commodities for DM care are not always  
260 available. Patients are compelled to purchase medications from private retail pharmacies at  
261 exorbitant prices.” (IDI#19)*

### 262 **3.2 Ni-kshay Portal, Ni-kshay Poshan Yojana (NPY) and Ni-kshay Aushadhi** 263 **Yojana (NAY)**

264 The NTEP in India has implemented three initiatives to improve TB programs: Ni-kshay Portal,  
265 Ni-kshay Poshan Yojana (NPY), and Ni-kshay Aushadhi Yojana (NAY). Ni-kshay Portal monitors  
266 TB patients, providing real-time data on diagnosis, treatment, and outcomes. NPY provides  
267 nutritional support and ensures free anti-TB drug supply. These initiatives have not only enhanced  
268 the quality of TB care but also facilitated the smooth supply of medicines and diagnostic kits.

## 269 **4. Information**

270 The health information system theme emphasizes the significant of data-driven decision-making  
271 and highlights the necessity for a robust health information system. Such a system would play a  
272 crucial role in facilitating the integration of TB, DM, and TC programs integration, as well as  
273 promoting data sharing across healthcare providers.

### 274 **4.1 Less awareness of HMIS among healthcare professionals and community**

275 The Health Management Information System (HMIS) is a web-based monitoring system in India  
276 designed to track health programs, policies, and interventions. It aids a crucial role in grading  
277 facilities, identifying aspirational areas, and reviewing Program Implementation Plan (PIP).  
278 However, a lack of knowledge about HMIS among healthcare professionals and community  
279 members results in its underutilization and hinders data-driven decision-making. Ultimately, this  
280 has an impact on healthcare services' quality and effectiveness.

281 *“I have noticed that many healthcare professionals are not familiar with the Health Management*  
282 *Information System and its benefits. This lack of awareness can lead to incomplete and inaccurate*  
283 *data collection, which can ultimately affect the quality of healthcare services. It is important for*  
284 *healthcare professionals to be trained and educated on the HMIS to ensure that accurate data is*  
285 *collected and used to improve the healthcare system.” (IDI# 2)*

## 286 **4.2 Presence of HMIS for every disease**

287 The integration of TB-DM-TC relies on dedicated HMIS systems for each disease. NTEP's Ni-  
288 kshay tracks TB patients from diagnosis to treatment completion, offering real-time data on cases,  
289 treatment outcomes, and drug resistance patterns. NPCDCS' portal monitors cancer and diabetes  
290 patients, while the NTCP's separate portal contributes to enhance disease control and management  
291 across the country.

292 *“For NTCP, there is a separate portal where all the data is put till state and district level.*  
293 *Quarterly data is used.” (IDI# 9)*

294 *“There is one portal for NCD. The data entry requires around 10 mins for 1 patient. The portal*  
295 *has info about HTN, DM, and about tobacco, and we get to know only if that person is suffering*  
296 *from TB or not.” (IDI# 19)*

## 297 **4.3 Underutilized NPCDCS portal**

298 Our data suggests that the NPCDCS portal is outdated, and underutilized, posing hindrances to  
299 integrated programs. With a paper-based reporting system and limited human resources, updating  
300 information on a vast array of diseases becomes challenging. This underutilization significantly  
301 hinders efficient health management and data recording for DM.

302 *“We have different registers for different diseases and we have paper-based records of all the*  
303 *patients when it comes to DM. I do not know about the other two conditions.” (IDI# 14)*

## 304 **4.4 Availability of Resources for IEC activities**

305 Some participants suggested that the ‘Information Education and Communication’ (IEC) activities  
306 are crucial for spreading awareness and promoting health-seeking behavior in the community.  
307 Resources like funding, trained personnel, and appropriate tools facilitate effective  
308 implementation.

309 *“I believe that availability of resources for IEC activities is crucial for the successful*  
310 *implementation of any health program. These resources can help in creating awareness. This will*

311 *not only increase the utilization of the system but also improve the quality of data being entered in*  
312 *HMIS.” (IDI# 1)*

## 313 **5. Finance**

314 Financing refers to the mechanisms used to fund healthcare services. The study highlights the need  
315 for adequate funding for the integrated program and emphasize the importance of innovative  
316 financing mechanisms for sustainability of integrated care.

### 317 **5.1 Availability of Financial Resources**

318 The study highlights the government's consistent budget allocation for the health sector, ensuring  
319 adequate funds for procurement of medicines, equipment, and other resources. This commitment  
320 has led to successful implementation of health programs like NTEP and NPCDCS, the recruitment  
321 of additional healthcare professionals, and the facilitation of health promotion campaigns and  
322 awareness programs, contributing to improved population health outcomes.

323 *“For TB funds are sufficient. Occasionally, a delay is observed. For other states, as per disease*  
324 *burden and geographical needs, it is allocated to states/districts. Usually, funds are sufficiently*  
325 *provided to all states.” (IDI# 5)*

### 326 **5.2 Different financial mechanisms for each program**

327 Our data portray different financial mechanisms for each program, potentially hindering the  
328 integrated implementation of health programs. These mechanisms contribute to discrepancies in  
329 funding allocation, affecting overall health system quality and procurement processes.  
330 Additionally, differences in compliance requirements and timelines can result in delays and  
331 inefficiencies in implementing the integrated program. To address these challenges, our data  
332 suggests the need for an integrated financial system to facilitate holistic resource allocation and  
333 management.

334 *“I think one of the biggest challenges we face is the separate funding mechanisms for each national*  
335 *health program. It's difficult to manage the allocation of resources and ensure that each program*  
336 *is adequately funded.” (IDI# 16)*

### 337 **5.3 Limitations in Integrating Programs Based on Financial Schemes**

338 The efficient utilization of resources in the health sector faces a substantial barrier in the form of  
339 limitations arising from integrating programs based on financial schemes. The challenge of

340 integrating financial schemes within health programs emerges from variations in funding  
341 mechanisms, funds availability, and procedural differences. This disparity can lead in an  
342 inequitable distribution of resources, leading to adverse health outcomes and influencing  
343 geographical or demographic priorities.

344 *“No, funding cannot be integrated. Activities can be integrated together but not funding. There*  
345 *are common cross-cutting strategies or a common budget is provided for few activities. It can be*  
346 *integrated for a particular activity but is not feasible for the whole program.” (IDI# 17)*

## 347 **5.4 Involvement of Private Sector**

348 The involvement of private sectors in health financing can serve as both a facilitator and a barrier  
349 to the effective implementation of national health programs, given the diversity opinions of  
350 participants. While private sector involvement has potential to enhance quality and coverage,  
351 variations across programs lead to discrepancies in funding and resource allocation. Study  
352 participants emphasized the importance of managing private sector involvement to complement  
353 the goals of national health program.

354 Participants also emphasized the importance of cross-sectoral planning and involving profit-  
355 making firms through Corporate Social Responsibility (CSR) at city district level. This strategy  
356 has potential to mobilize resources and funding, ultimately contributing to the improvement of  
357 community health.

358 *“Yes, it is happening in NTEP. For an increase in private notifications, we are taking help from*  
359 *private agencies, which is currently functional in 35 districts. Current financing is good. Paper*  
360 *based needs are always there. If expenditure is not there only then there is no point. When we get*  
361 *saturated with our own funds then we go to the private sector.” (IDI# 11)*

## 362 **6. Governance & Leadership**

363 Effective integrated care management demands strong governance and leadership, necessitating  
364 robust leadership, political commitment and the identification and resolution of barriers and  
365 facilitators.

## 366 **6.1 Underdefined systems for involvement of Private Practitioners (PP)**

367 Underdefined systems for private practitioners' involvement in the integrated health programs  
368 pose a hindrance to effective implementation in India, particularly in rural and remote areas. This  
369 lack of clarity leads to confusion, uncertainty, and an uneven distribution of healthcare services.

370 The absence of well-defined systems, coupled with a lack of incentives and recognition, hampers  
371 the engagement of PP entities in national health programs. Despite functioning independently, the  
372 absence of recognition may demotivate their participation. This deficiency can lead to the  
373 duplication of efforts and inefficiencies in healthcare service delivery.

374 *“PPP is there but has not worked out on all levels. If you want to incorporate private sectors,  
375 there are possibilities of PPP like that in TB. It can be done for DM too. There are few NGOs  
376 working with NTCP, but there are no private hospitals. That is not the domain for them. While  
377 doing PPP, there should be some mandated CSR activities regarding the promotion of harmful  
378 effects.” (IDI# 4)*

## 379 **6.2 Well-designed Programs**

380 The effective implementation of healthcare services relies heavily on well-designed national health  
381 programs. Programs such as NTEP, NCD and TC programs concentrate on specific health issues,  
382 employ evidence-based strategies, and have clear goals, objectives, and structured activities.  
383 Consistent monitoring and evaluation mechanism ensure prompt feedback and corrective  
384 measures. Study participants unanimously agreed that these programs provide a framework for the  
385 coordination and integration of healthcare services, ensuring timely and efficient delivery.

386 *“I believe that the current national health programs are well designed and have the potential to  
387 make a significant impact on the health of the population. The programs have been developed  
388 based on extensive research and consultation with experts in the field.” (IDI# 16)*

## 389 **6.3 History of Tobacco Use Documented in TB as well as DM program**

390 Identifying individuals at risk of developing diseases like TB and DM relies on the crucial  
391 assessment of their tobacco use history. These data play a pivotal role in shaping targeted  
392 interventions, pinpointing those at risk, and tracking their progress in control and treatment  
393 response.

394 *“I think documenting the history of tobacco use in TB and DM programs is a really important step  
395 in addressing the burden of tobacco-related diseases in India. By identifying patients with a history*

396 *of tobacco use, we can provide them with targeted interventions and support to quit smoking or*  
397 *chewing tobacco.” (IDI# 9)*

#### 398 **6.4 Lack of Optimum Coordination, Communication and Discussion**

399 Our data strongly suggest that the effectiveness of integrated programs rely on collaboration and  
400 coordination among national health programs. Facilitated by open communication and discussions,  
401 this collaborative approach helps identify areas of overlap, prevents duplication, identifies mutual  
402 benefits, and addresses challenges or barriers that could impede the success of the program. Very  
403 importantly the cross talk between all three programs for integration was emphasized in the data  
404 from both the sites.

405 While the new integrated program may face challenges in regulation and accountability of  
406 policymakers and program managers, strong regulation and collaborative technical standards will  
407 likely attract interest from implementers and funding agencies. Most participants also agreed that  
408 a TB-DM-TC integrated program within the healthcare delivery system is feasible, provided the  
409 DM program's gap is addressed, and specific tasks are identified for all levels.

410 *“I believe that optimum communication and discussion are essential to ensure equal benefit for*  
411 *the participating programs. As a healthcare professional, I have seen first-hand benefits of*  
412 *collaboration and coordination between different programs, especially when it comes to delivering*  
413 *healthcare services in remote and under-served areas. Effective communication ensures that all*  
414 *stakeholders are aware of the programs and their objectives, reducing the duplication of efforts*  
415 *and ensuring that resources are utilized efficiently.” (IDI# 22)*



## 416 **Discussions:**

417 The primary objective of this study was to investigate potential health system barriers and  
418 facilitators that merit consideration in the integration of the TB-DM-TC program. In this section  
419 we shed light on the implications of these findings for program coordinators and implementers in  
420 India, as well as offer insights into potential strategies for overcoming these challenges and  
421 optimizing the integration process.

422

423 The absence of collaboration between integrated services for TB-DM and TB-TC is primarily due  
424 to the lack of precise operational guidelines, unlike successful integration programs like TB-HIV.  
425 To address this issue, leveraging insights from the TB-HIV integration program could facilitate  
426 the integration of TB, DM, and TC programs. Success in these programs hinges on their  
427 comprehensive, continuous, competent, compassionate, and cost-effective, all planned within the  
428 limitations of available resources (11). For illustration, patients with elevated blood sugar levels  
429 are typically referred to NCD clinics. However, not all individuals with DM undergo TB testing,  
430 as only those with symptoms are screened and directed to TB clinics. This approach may not be  
431 comprehensive and could result in missed TB cases in DM patients (12). Considering the high  
432 prevalence of DM in the community and the modes of diagnosis and treatment, testing all patients  
433 with DM for TB may seem far-fetched. Such a strategy could potentially burden the health system  
434 with unnecessary TB testing. To address this challenge, a well-defined approach to TB screening  
435 in all DM patients is necessary. This approach should be evidence-based, taking into account the  
436 prevalence of TB and DM in the community and the available resources.

437

438 The prevailing referral system has proven inadequate in providing feedback on referral outcomes,  
439 leading to a lack of communication and follow-up between primary care facilities and referral  
440 hospitals. This deficiency indicates a misalignment with current standards, resulting patients  
441 identified by the system to fail through the cracks despite considerable efforts. Establishing a  
442 stringent system that ensures continuous monitoring of patients registered within the public health  
443 framework receive until recovery is crucial. Therefore, establishing efficient communication  
444 channels and robust referral systems become imperative. The study also identified that self-  
445 referrals to doctors and higher specialization levels hinder healthcare delivery in rural areas.  
446 Patients' non-compliance with the referral system's hierarchy, coupled with a perceived  
447 inadequacy of primary healthcare facilities, leads them to seek care from doctors with higher

448 specialization. This fragmentation of health services can result in worse outcomes. Improving  
449 patient education and awareness about the referral system hierarchy is crucial for coordinated care.  
450 Strengthening the referral system requires effective communication, coordination, and monitoring  
451 mechanisms to ensure compliance with the hierarchy.

452  
453 Based on its findings, the study highlights that the scarcity of tobacco control centers hinders the  
454 integration of smoking control services into the TB-DM program. To improve access, the  
455 establishment of more centers, pilot tests and carry out pre-implementation testing in real-world  
456 environments are recommended. It is advised to develop context-specific training materials for  
457 health personnel to address issues like stigma, ignorance, low knowledge, and illiteracy (13). The  
458 Ministry of Health and Family Welfare's limited tobacco control counseling training initiative has  
459 been slow, and further efforts are needed to improve the implementation of NTCP and enhance  
460 skills of healthcare professionals. Additionally, the government could explore offering incentives  
461 to private healthcare providers for their involvement in tobacco control programs to encourage  
462 their active participation.

463  
464 The study identified potential opportunities within the Indian health system to implement the  
465 proposed TB-DM-TC strategy, which is in accordance with prior studies. Notably, the well-  
466 organized TB control programme (14) and the partially institutionalized TB-DM screening (8,15)  
467 serve as foundations for potential integration. This finding underscores the existence of a robust  
468 framework upon which to the integration of DM and tobacco control programs. The well-  
469 established and widely in the Indian health system provides an opportunity to leverage existing  
470 infrastructure and expand the scope of care to include DM and TC services.

471  
472 Despite established regulations and standards, service delivery for TB/DM comorbidity remains  
473 deficient. This is a matter that cannot be neglected, particularly as India strives to achieve TB-free  
474 status five years ahead of global targets. Vigilance within healthcare systems is paramount, and  
475 the community must be informed about this critical issue.

476  
477 In line with them, the study identifies the main barriers to integrated care: inadequate knowledge  
478 of healthcare providers (1,7,8); lack of diagnostic tools and equipment (especially DM kit and  
479 medicine supplies); and insufficient attention to DM control and smoking control program. The  
480 lack of knowledge in HMIS contributes to these barriers, impacting the motivation and

481 engagement of healthcare workers and community members in utilizing the system. Healthcare  
482 workers may perceive HMIS as an additional burden to their already demanding workload, leading  
483 to resistance in its implementation. Therefore, effective communication strategies are critically  
484 needed. Moreover, the community's underappreciation of TB/DM comorbidity leads to a lack of  
485 awareness and knowledge about tobacco and alcohol use. Addressing this issue requires  
486 community-based interventions that aim to create awareness, reduce stigma, and motivate  
487 individuals to seek healthcare services. Additionally, health workers should be educated on the  
488 importance of intervening in smoking for TB patients, and providers must receive proper training  
489 (13).

490  
491 The study also highlights the importance of cross-program and cross-sectoral collaboration for  
492 efficient execution and sustainability in integrated programs. This collaborative approach not only  
493 promotes resource efficiency but also minimizes duplication and ensures the continuity of care.  
494 The significance of multisectoral coordination and cooperation, particularly involving private  
495 primary care providers in the collaborative management of TB-DM, has been discussed in  
496 Indonesia-based study (16) and consistently advocated by other studies (1,17).

497  
498 The establishment of culture-sensitive infrastructure is crucial for the success of preventive  
499 operations, such as screening, to ensure user engagement and early acceptance. The suggestion for  
500 tri-directional screening of TB-DM-smoking at community outreach and primary healthcare  
501 facilities, along with intensive health promotion activities to increase community health literacy  
502 (7). However, if the Information Education and Communication (IEC) messages are not culturally  
503 appropriate or not translated into local languages, they may not effectively reach the target  
504 population. Hence, modifying or adapting the IEC materials to the local context is necessary.  
505 Additionally, enhancing the national health information system is recommended to address  
506 reporting and surveillance issues (1,17). Implementers and decision-makers should collaborate to  
507 create an integrated health information system, establish shared objectives, and provide training  
508 for care providers on reporting and recording. This study offers decision-makers implementation  
509 tactics for tailored interventions within the resource-constrained Indian health system.

## 510 **Conclusion**

511 Overall, this study outlines the barriers and facilitators to implementing an integrated model. This  
512 study has illuminated the substantial challenges in integrating the TB, DM, and TC programs  
513 within India's public health systems. The findings underscore the urgent need for a comprehensive  
514 and cohesive approach to tackle India's burden of TB, DM and tobacco smoking. Furthermore, it  
515 highlights the importance of establishing operational guidelines to foster collaboration among  
516 various public health initiatives, setting a precedent for integrating additional programs within  
517 India.

518  
519 Our study suggests leveraging the established NTEP infrastructure as a robust foundation for  
520 incorporating DM and TB services within primary care, underscoring the necessity of addressing  
521 deficiencies in service delivery for TB/DM comorbidity, especially in light of India's aspirations  
522 to achieve TB-free status. Also, it strongly advocates for the convergence of the three programs  
523 into a single-window approach, along with the establishment of effective feedback and referral  
524 systems, and the development of harmonized digital data entry platforms. A multifaceted approach  
525 is recommended for policymakers and management of the healthcare system use.

526  
527 To enhance user engagement and facilitate early detection, the study proposes the implementation  
528 of culturally sensitive infrastructure, along with community-based interventions and health  
529 promotion activities. Moreover, it highlights the significance of enhancing the national health  
530 information system and implementing tailored interventions within resource-constrained  
531 environments for the successful integration efforts. Additionally, the study emphasizes the  
532 necessity of ongoing research to continually evaluate the efficacy of integrated models in  
533 addressing complex health issues in the Indian context.

## 534 **Recommendations:**

535 Participants recommended establishing an independent integrated TB-DM-TC program using  
 536 existing resources, developing joint technical guidelines for standardization, financial planning,  
 537 and national budgeting. The study participants also advocated for the integration of patient record  
 538 software onto a single platform with a unique identification number. Furthermore, availability of  
 539 single visits for TB patients with comorbidities, enabling crosstalk of all three programs, involving  
 540 private practitioners in screening and sensitizing them for Ni-kshay registration should be done.  
 541 There must be rigorous implementation of the feedback and referral system, training modules  
 542 incorporating joint planning, implementation, monitoring, and evaluation. Also, there should be  
 543 provisional psychosocial support for patients, and enhance the use of digital health technologies  
 544 among communities. These recommendations aim to improve patient outcomes and efficiency in  
 545 the national health programs.

| Theme                      | Recommendation                                    | Action Points/Benefits                                                                                                                                                                          |
|----------------------------|---------------------------------------------------|-------------------------------------------------------------------------------------------------------------------------------------------------------------------------------------------------|
| <b>1. Service Delivery</b> | Deployment of rigorous screening procedures       | Rigorous screening procedures for DM during TB treatment are essential in identifying patients with comorbidities by creating standardized protocols                                            |
|                            | Single visit for patients with comorbidities      | The implementation of a single visit for TB patients with comorbidities will improve patient experience and reduce the burden of multiple visits                                                |
|                            | Single window for service provision               | The provision of a single window for service provision will enable effective communication and coordination among the three programs, leading to improved patient outcomes                      |
|                            | Rigorous implementation of the linkage mechanisms | The rigorous implementation of the feedback and referral system will enable timely and effective communication among healthcare personnel, improving patient outcomes and program effectiveness |
|                            | Provision of psychosocial support to patients     | Develop a coordinated approach for the provision of psychosocial support to patients with TB, DM, and other conditions, addressing their mental and                                             |

|                                             |                                                                                            |                                                                                                                                                                                                        |
|---------------------------------------------|--------------------------------------------------------------------------------------------|--------------------------------------------------------------------------------------------------------------------------------------------------------------------------------------------------------|
|                                             |                                                                                            | emotional health needs                                                                                                                                                                                 |
| <b>2. Health Workforce</b>                  | Incorporating joint training modules                                                       | Training modules incorporating joint planning, implementation, monitoring, and evaluation will improve healthcare personnel's skills and knowledge, leading to effective program implementation        |
|                                             | Address overburden through adequate staffing                                               | Mitigate the work pressure by making sure there is a sufficient and evenly distributed workforce to handle the needs of integrated program                                                             |
|                                             | Encourage the enthusiasm and dedication among health workers                               | This can be accomplished by giving them opportunities for professional progress within the integrated program, as well as recognition and support                                                      |
| <b>3. Medical Products &amp; Technology</b> | Address the cost-effectiveness and stock-outs of diabetes related medications and supplies | Investigating tactics like subsidies, bulk procurement, or alliances with pharmaceutical firms may be beneficial                                                                                       |
| <b>4. Information</b>                       | Integrated software on a single platform for seamless data sharing                         | Integrating the patient record software onto a single platform with a unique identification number can significantly improve the delivery of healthcare services                                       |
|                                             | Sensitize health professionals to the HMIS                                                 | Campaigns for focused training and information dissemination can help accomplish this                                                                                                                  |
| <b>5. Finance</b>                           | Involve Private Practitioners in screening                                                 | Involving private practitioners in the screening of TB and DM and sensitizing them for Ni-kshay registration will increase the reach of national health programs, especially in remote and rural areas |
|                                             | Utilize integrated financing strategies to prevent duplication                             | Establishing a single budget may benefit from doing a thorough financial assessment by identifying overlapping expenses                                                                                |

|                                       |                                                                    |                                                                                                                                                                                                                                               |
|---------------------------------------|--------------------------------------------------------------------|-----------------------------------------------------------------------------------------------------------------------------------------------------------------------------------------------------------------------------------------------|
| <b>6. Governance &amp; Leadership</b> | Improve stakeholder collaboration, communication, and coordination | Extensive stakeholder mapping, the establishment of a coordinating body to monitor integration efforts, the implementation of standardized reporting practices, and adopting a conflict resolution protocol are few actions that can be taken |
|---------------------------------------|--------------------------------------------------------------------|-----------------------------------------------------------------------------------------------------------------------------------------------------------------------------------------------------------------------------------------------|

546

## 547 **References:**

- 548 1. Fazaludeen Koya S, Lordson J, Khan S, Kumar B, Grace C, Nayar KR, et al. Tuberculosis and  
549 Diabetes in India: Stakeholder Perspectives on Health System Challenges and Opportunities  
550 for Integrated Care. *J Epidemiol Glob Health*. 2022 Mar 1;12(1):104–12.
- 551 2. Global Health Estimates: Life expectancy and leading causes of death and disability [Internet].  
552 [cited 2023 Dec 2]. Available from: [https://www.who.int/data/gho/data/themes/mortality-and-](https://www.who.int/data/gho/data/themes/mortality-and-global-health-estimates)  
553 [global-health-estimates](https://www.who.int/data/gho/data/themes/mortality-and-global-health-estimates)
- 554 3. Bailey SL, Grant P. ‘The tubercular diabetic’: the impact of diabetes mellitus on tuberculosis  
555 and its threat to global tuberculosis control. *Clin Med*. 2011 Aug;11(4):344–7.
- 556 4. World Health Organization, International Union against Tuberculosis and Lung Disease.  
557 Collaborative framework for care and control of tuberculosis and diabetes. 2011 [cited 2023  
558 Mar 8];(WHO/HTM/TB/2011.15). Available from:  
559 <https://apps.who.int/iris/handle/10665/44698>
- 560 5. Thakur G, Thakur S, Thakur H. Status and challenges for tuberculosis control in India –  
561 Stakeholders’ perspective. *Indian J Tuberc* [Internet]. 2020 Oct 12 [cited 2023 Jul 18];  
562 Available from: <https://www.ncbi.nlm.nih.gov/pmc/articles/PMC7550054/>
- 563 6. Restrepo BI. Diabetes and tuberculosis. *Microbiol Spectr*. 2016  
564 Dec;4(6):10.1128/microbiolspec.TNMI7-0023–2016.
- 565 7. Majumdar A, Wilkinson E, Rinu PK, Maung TM, Bachani D, Punia JS, et al. Tuberculosis-  
566 diabetes screening: how well are we doing? A mixed-methods study from North India. *Public*  
567 *Health Action*. 2019 Mar 21;9(1):3–10.
- 568 8. Salifu RS, Hlongwa M, Hlongwana K. Implementation of the WHO’s collaborative  
569 framework for the management of tuberculosis and diabetes: a scoping review. *BMJ Open*.  
570 2021 Nov 16;11(11):e047342.
- 571 9. Strengthening health systems [Internet]. [cited 2023 Dec 2]. Available from:  
572 [https://international-partnerships.ec.europa.eu/policies/human-development/strengthening-](https://international-partnerships.ec.europa.eu/policies/human-development/strengthening-health-systems_en)  
573 [health-systems\\_en](https://international-partnerships.ec.europa.eu/policies/human-development/strengthening-health-systems_en)
- 574 10. Nevedal AL, Reardon CM, Opra Widerquist MA, Jackson GL, Cutrona SL, White BS, et al.  
575 Rapid versus traditional qualitative analysis using the Consolidated Framework for  
576 Implementation Research (CFIR). *Implement Sci*. 2021 Jul 2;16(1):67.



- 577 11. Friedland G, Harries A, Coetsee D. Implementation Issues in Tuberculosis/HIV Program  
578 Collaboration and Integration: 3 Case Studies. *J Infect Dis.* 2007 Aug  
579 15;196(Supplement\_1):S114–23.
- 580 12. Kweza PF, Van Schalkwyk C, Abraham N, Uys M, Claassens MM, Medina-Marino A.  
581 Estimating the magnitude of pulmonary tuberculosis patients missed by primary health care  
582 clinics in South Africa. *Int J Tuberc Lung Dis.* 2018 Mar 1;22(3):264–72.
- 583 13. Dogar O, Elsey H, Khanal Bhattarai S, Siddiqi K. Challenges of Integrating Tobacco Cessation  
584 Interventions in TB Programmes: Case Studies from Nepal and Pakistan. 2016 Jun 1;
- 585 14. Workneh MH, Bjune GA, Yimer SA. Assessment of health system challenges and  
586 opportunities for possible integration of diabetes mellitus and tuberculosis services in South-  
587 Eastern Amhara Region, Ethiopia: a qualitative study. *BMC Health Serv Res.* 2016 Apr  
588 19;16:135.
- 589 15. Salifu RS, Hlongwana KW. Barriers and facilitators to bidirectional screening of TB-DM in  
590 Ghana: Healthcare workers' perspectives. *PLoS ONE.* 2020 Jul 14;15(7):e0235914.
- 591 16. Arini M, Sugiyo D, Permana I. Challenges, opportunities, and potential roles of the private  
592 primary care providers in tuberculosis and diabetes mellitus collaborative care and control: a  
593 qualitative study. *BMC Health Serv Res.* 2022 Feb 17;22(1):215.
- 594 17. Long Q, Guo L, Jiang W, Huan S, Tang S. Ending tuberculosis in China: health system  
595 challenges. *Lancet Public Health.* 2021 Dec 1;6(12):e948–53.
- 596

597 **Annexure-1**

598 Following is the study tool used for collecting the data:

599

**Key-Informant Interview**

**Objectives**

1. To understand the existing programs in relation to TB, DM, and smoking control programmes
2. To explore the facilitators and barriers for the integration of the three programmes at the national, provincial/state and district levels

**Framework**

The key information interview is developed based on the six building blocks of the health system as the main framework, which includes the following dimensions: (1) Service delivery, (2) Health workforce; (3) Health information system; (4) Financing; (5) Governance and leadership; and (6) Access to essential medicine.

**Interview Guide**

**Opening questions:**

1. Which institution are you working at?
2. What is your current position and responsibility?
3. How are the states (province/district/city) dealing with the dual burden of communicable and non-communicable diseases?
4. Has the PIP (Programme Implementation Plan) been tailored to the disease burden in the state and district level?
5. Is there a budget allocation?
6. Are you doing any implementation research in this regard?

Please indicate how often have your institution been working together with the following institutions.

| Institutions | Never | Rarely (Every other year) | Sometime (1-3 times a year) | Often (4-5 times per year) | Very often (At least 6 times per year) |
|--------------|-------|---------------------------|-----------------------------|----------------------------|----------------------------------------|
| A.           |       |                           |                             |                            |                                        |
| B.           |       |                           |                             |                            |                                        |
| C.           |       |                           |                             |                            |                                        |
| D.           |       |                           |                             |                            |                                        |
| E.           |       |                           |                             |                            |                                        |
| F.           |       |                           |                             |                            |                                        |

600

## **Interview questions related to the health system block:**

### **Service delivery**

- How is the bi-directional screening of TB and DM organized at different levels of the health system? Is it working well? Does it require more strengthening? What do you think will help enhance integration?
- What are the opportunities that you see and the barriers they face when they plan to do the TB and DM screening?
- How do we ensure the comprehensive screening of TB and DM through both active and passive screening?
- What is the current situation regarding the above and what are suggestions for more comprehensive integration of communicable and non-communicable disease programme?

### **Health workforce**

- The human resources: Do they have the personnel to do the screening/disease management? Sufficiency? Task shifting?
- Training: do you have the specific knowledge to do the integrated disease control program (e.g. TB-DM)? Have you been trained in conducting screening and disease control?
- Coordination between the different disease program staff

### **Health information system**

- Current disease program information system: the linkages of infrastructure in the different programme, the load of recording and reporting
- The current plan of an integrated information system
- Are the data used in the coordination meeting?
- Are they using the data for evidence-based decision making?

### **Financing**

- Fund-flow mechanisms - do the fund come to the district/PHC level?
- Are government funding available for TB/DM/Tobacco control programme? Assess differences between the states/districts
- Would you think the integration of Communicable and Non-Communicable program is feasible based on the financing scheme? Why?
- Is the private sector involved in financing the integrated programs? Continuity of the funding?

### **Governance and Leadership**

- What kind of inter-departmental and inter-sectoral cooperations/coalitions they have within and outside the government?
- Are there guidelines? Have they been disseminated? What do you think about the guideline?
- Leadership and coordination for sharing resources (diagonal sharing) - whether the rich resources would like co-share with another program
- Fund flow mechanism
- What are the common challenges you would face in the integration of the programme?
- Is there any policy to involve private sectors and NGOs in the integration of communicable and non-communicable diseases control programme.

### **Access to essential medicine**

- Do you have sufficient screening and diagnosis kits (sputum test, GeneXpert, etc) for tuberculosis and diabetes?
- Do you have sufficient essential medicine for treatment for tuberculosis and diabetes?
- What are the estimated costs of treating a patient with TB and/or DM?

Please think of all the actions that **your institution** can do to facilitate the integration of TB, DM and tobacco programme. There is no right and wrong answer, please list all the actions that you can think of.

Please think of all the actions that **other institutions mentioned above** can do to facilitate the integration of TB, DM and tobacco programme. There is no right and wrong answer, please list all the actions that you can think of.
